# Supplementary material for: Managing optical heating via Al3+-doping in Er3+:SrF2 powder phosphors prepared by combustion synthesis
Source: Royal Society of Chemistry journal article supplement (doi:10.1039/c8dt04194f), 2019-01-01
Supplement: c8dt04194f1.pdf [file c8dt04194f1.pdf]

## Supplementary Information

### Managing optical heating via Al<sup>3+</sup>-doping in Er<sup>3+</sup>:SrF<sub>2</sub> powder phosphor prepared by combustion synthesis

Nikifor Rakov

PG - Ciência dos Materiais, Universidade Federal do Vale do São Francisco, 48902-300 Juazeiro, BA, Brazil.

Renato B. Guimarães and Glauco S. Maciel\*

Instituto de Física, Universidade Federal Fluminense, 24210-346 Niterói, RJ, Brazil.

\*glauco@if.uff.br

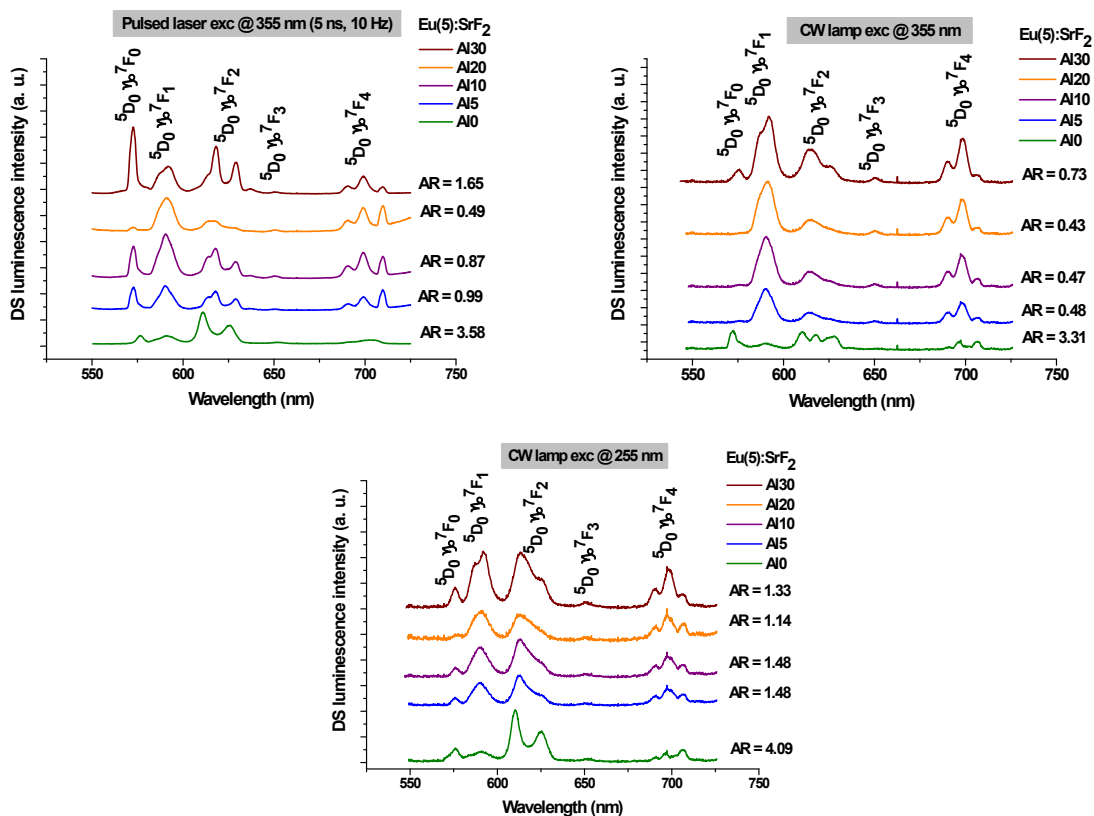

Fig. S1. Down-shifted (DS) luminescence spectra of Eu<sup>3+</sup>-doped SrF<sub>2</sub> powders for different doping concentrations of Al<sup>3+</sup> (shown in units of weight percent) and obtained under different excitation conditions. AR is the asymmetry ratio defined as the ratio between the integrated signal intensities of <sup>5</sup>D<sub>0</sub> → <sup>7</sup>F<sub>2</sub> (range: 603-633 nm) and <sup>5</sup>D<sub>0</sub> → <sup>7</sup>F<sub>1</sub> (range: 580-603 nm).

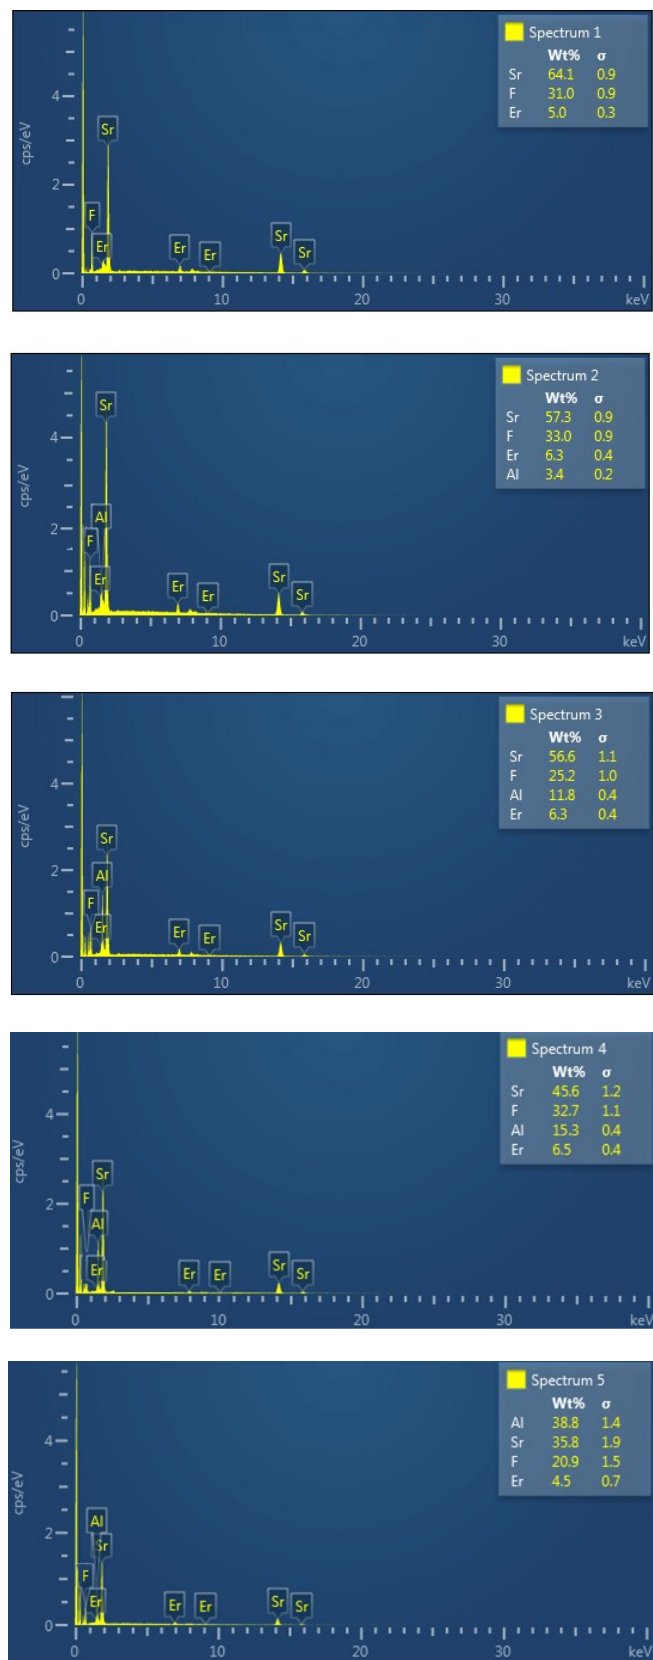

**Fig. S2.** EDX spectra of SrF<sub>2</sub> powder samples containing 5 wt. % doping concentration of Er<sup>3+</sup> and 0 (Spectrum 1), 5 (Spectrum 2), 10 (Spectrum 3), 20 (Spectrum 4) and 30 (Spectrum 5) wt. % doping concentrations of Al<sup>3+</sup>. The insets of the EDX data show results of a semi-quantitative view of the elemental composition (in units of weight percent).
